# Supplementary material for: Investigation of the role of anions in hydrotalcite for quasi-solid state dye-sensitized solar cells application
Source: Royal Society of Chemistry journal article supplement (doi:10.1039/c3ta01581e), 2013-01-01
Supplement: c3ta01581e.pdf [file c3ta01581e.pdf]

# Investigation of the role of anions in hydrotalcite for quasi-solid state dye-sensitized solar cells application

Xiu Wang,<sup>a</sup> Ran Deng,<sup>a</sup> Sneha A. Kulkarni,<sup>b</sup> Xiaoyan Wang,<sup>c</sup> Stevin Snellius Pramana,<sup>a</sup>  
Chee Cheong Wong,<sup>a</sup> Michael Grätzel,<sup>de</sup> Satoshi Uchida<sup>f</sup> and Subodh G. Mhaisalkar<sup>\*a b d</sup>

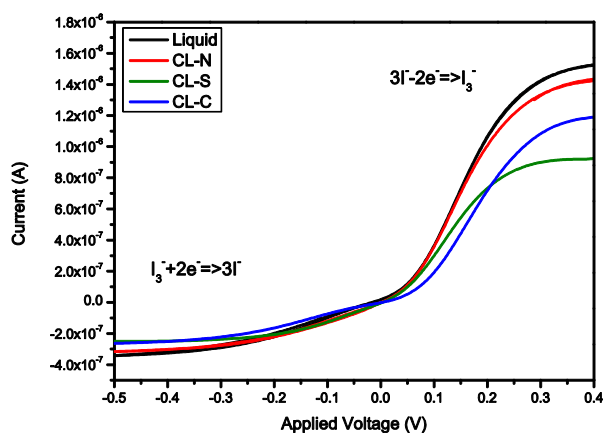

C-V curves of dummy liquid electrolyte and dummy gel electrolyte with different type of anionic hydrotalcite containing  $\text{I}_2$  and PMII
